# Supplementary material for: P2Y6 Receptor Activation Promotes Inflammation and Tissue Remodeling in Pulmonary Fibrosis
Source: PubMed Central journal article supplement (PMC5572280; doi:10.3389/fimmu.2017.01028), 2017-08-22
Supplement: image_1.pdf [file image_1.pdf]

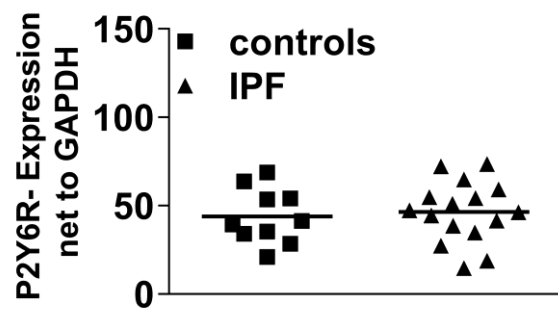

**Supplementary figure. P2Y<sub>6</sub>R expression in idiopathic pulmonary fibrosis.**

Expression of P2Y<sub>6</sub> receptor subtypes on BAL cells derived from IPF patients (n= 16) and healthy individuals (n=10) was determined by quantitative RT-PCR.
